# Supplementary material
Source: MDPI journal article supplement (https://www.mdpi.com/2073-4352/13/2/165)
Supplement: s1 [file s1 › crystals-2144776-supplementary.pdf]

# Supplementary Materials: *Ab Initio* Theoretical Study of DyScO<sub>3</sub> at High Pressure

Enrique Zanardi <sup>1</sup>, Silvana Radescu <sup>1</sup>, Andrés Mujica <sup>1</sup>, Plácida Rodríguez Hernández <sup>1</sup> and Alfonso Muñoz <sup>1,\*</sup>

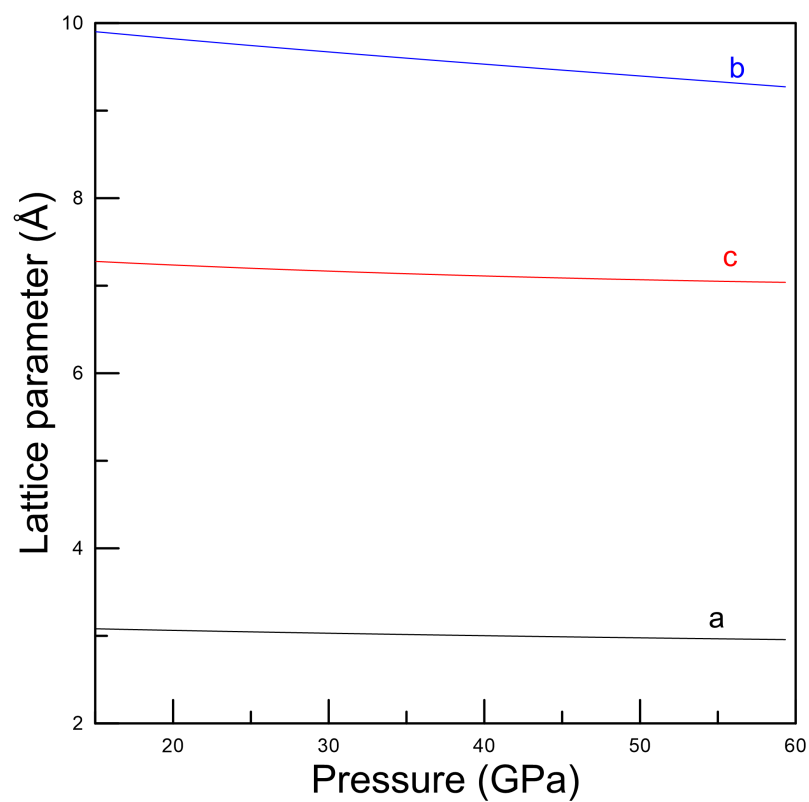

**Figure S1.** Variation of the lattice parameters *a*, *b*, *c* with pressure for the proposed *Cmcm* phase.

**Table S1.** Elastic moduli *B*, *E* and *G*; *B*/*G* ratio; and Poisson’s ratio *ν* for the proposed *Cmcm* phase., calculated using the Voigt, Reuss, and Hill approximations from the calculated elastic coefficients at 15 GPa.

|                            | Voigt | Reuss | Hill            |
|----------------------------|-------|-------|-----------------|
| Bulk modulus $B_0$ (GPa)   | 231.6 | 230.1 | 230.9           |
| Shear modulus $G_0$ (GPa)  | 101.7 | 90.1  | 95.9            |
| Young modulus $E_0$ (GPa)  | 266.1 | 239.2 | 252.6           |
| Poisson’s ratio $\nu_0$    | 0.309 | 0.327 | 0.318           |
| Bulk/Shear ratio $B_0/G_0$ | 2.278 | 2.553 | 2.407 (ductile) |

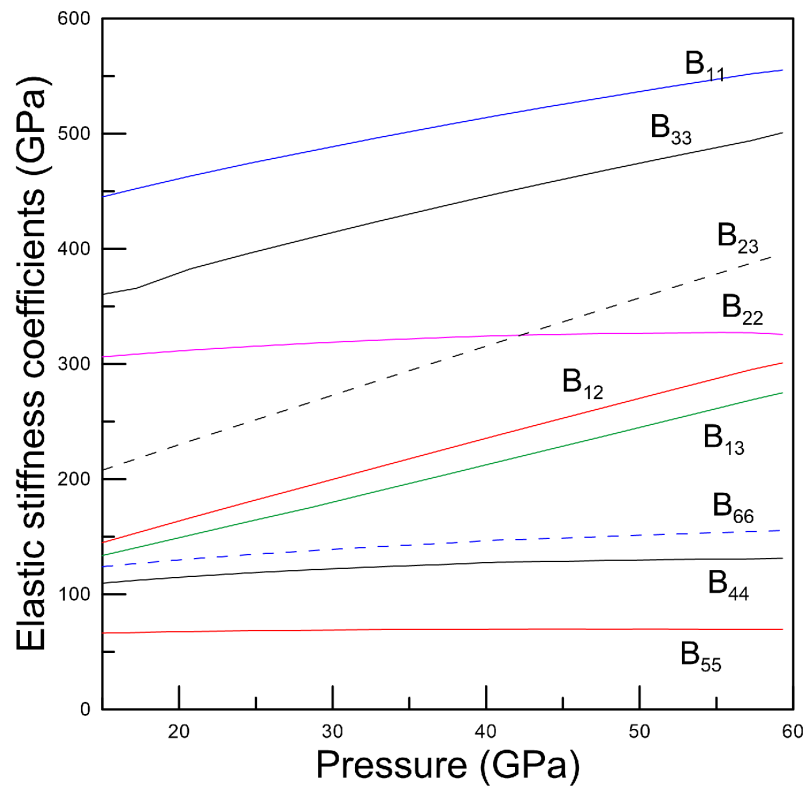

**Figure S2.** Calculated pressure evolution of the elastic stiffness coefficients for the proposed *Cmcm* phase.

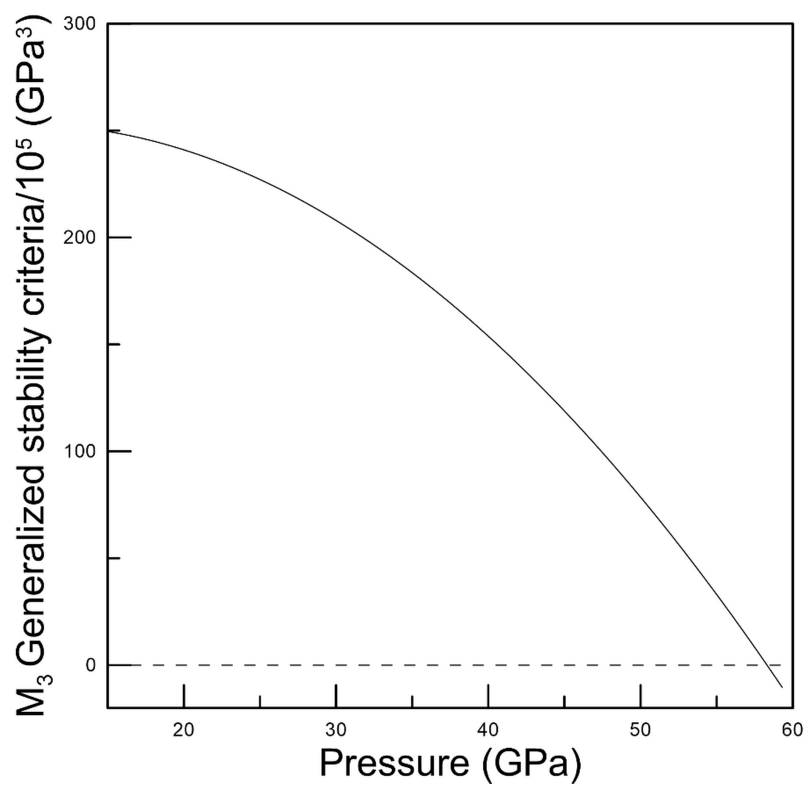

**Figure S3.**  $M_3$  generalized stability criteria as a function of pressure for the proposed *Cmcm* phase..

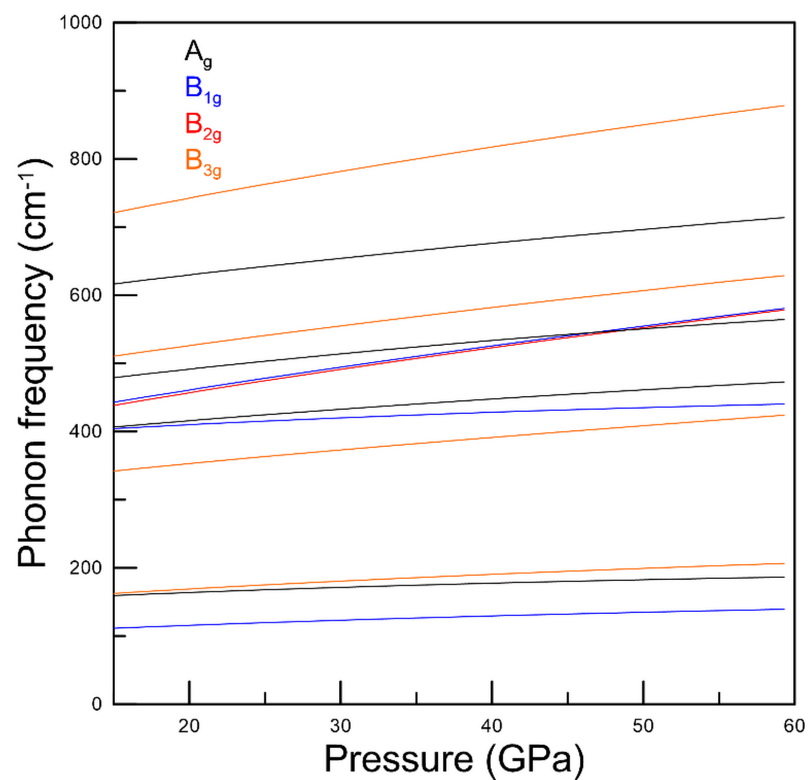

**Figure S4.** Pressure dependence of the calculated Raman-active modes of the *Cmcm* phase.

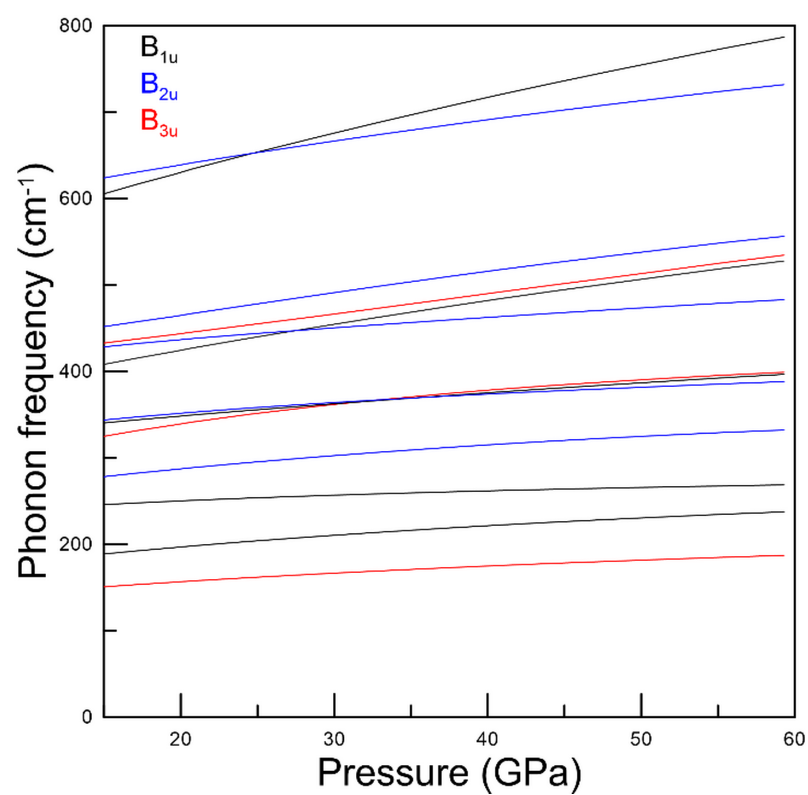

**Figure S5.** Pressure dependence of the calculated infrared modes of the *Cmcm* phase.

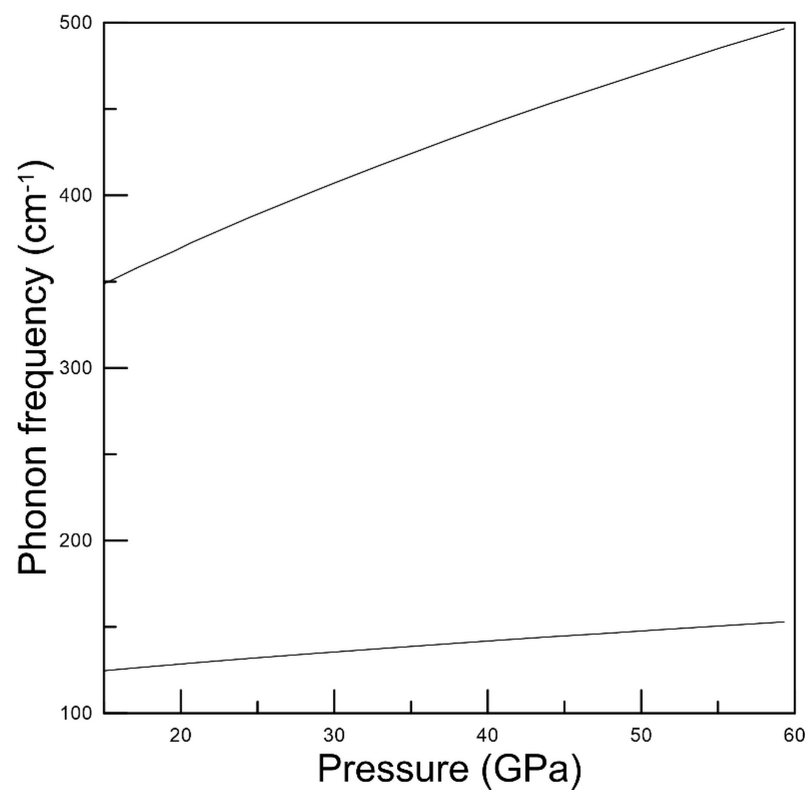

**Figure S6.** Pressure dependence of the calculated silent modes of the *Cmcm* phase.

**Table S2.** Calculated Raman (R), infrared (IR), and silent (S) mode frequencies for the proposed *Cmcm* phase as calculated in this work, and their respective pressure coefficients obtained by fitting in the range up to 60 GPa with a quadratic equation  $\omega(p) = \omega_o + \alpha p + \beta p^2$ .

| Mode            | $\omega_o$ (cm <sup>-1</sup> ) | $\alpha$ (cm <sup>-1</sup> GPa <sup>-1</sup> ) | $\beta$ (cm <sup>-1</sup> GPa <sup>-2</sup> ) |
|-----------------|--------------------------------|------------------------------------------------|-----------------------------------------------|
| <b>Raman</b>    |                                |                                                |                                               |
| A <sub>g</sub>  | 145.1                          | 1.06                                           | -0.0061                                       |
|                 | 377.4                          | 2.08                                           | -0.0081                                       |
|                 | 438.5                          | 2.92                                           | -0.0134                                       |
|                 | 575.1                          | 2.93                                           | -0.0100                                       |
| B <sub>1g</sub> | 97.8                           | 0.99                                           | -0.0050                                       |
|                 | 385.4                          | 1.38                                           | -0.0078                                       |
|                 | 387.6                          | 3.87                                           | -0.0105                                       |
| B <sub>2g</sub> | 381.2                          | 4.01                                           | -0.0117                                       |
| B <sub>3g</sub> | 142.0                          | 1.49                                           | -0.0068                                       |
|                 | 309.1                          | 2.32                                           | -0.0066                                       |
|                 | 462.3                          | 3.38                                           | -0.0097                                       |
|                 | 654.3                          | 4.72                                           | -0.0161                                       |
| <b>Infrared</b> |                                |                                                |                                               |
| B <sub>1u</sub> | 163.1                          | 1.90                                           | -0.0110                                       |
|                 | 232.9                          | 0.99                                           | -0.0065                                       |
|                 | 316.0                          | 1.74                                           | -0.0065                                       |
|                 | 356.5                          | 3.66                                           | -0.0130                                       |
|                 | 527.7                          | 5.51                                           | -0.0194                                       |
| B <sub>2u</sub> | 248.7                          | 2.19                                           | -0.0133                                       |
|                 | 320.3                          | 1.77                                           | -0.0107                                       |
|                 | 404.7                          | 1.73                                           | -0.0070                                       |
|                 | 406.6                          | 3.13                                           | -0.0100                                       |
|                 | 575.9                          | 3.42                                           | -0.0134                                       |
| B <sub>3u</sub> | 132.2                          | 1.37                                           | -0.0076                                       |
|                 | 279.7                          | 3.46                                           | -0.0247                                       |
|                 | 398.7                          | 2.23                                           | 0.0011                                        |
| <b>Silent</b>   |                                |                                                |                                               |
| A <sub>u</sub>  | 113.0                          | 0.83                                           | -0.0027                                       |
|                 | 283.9                          | 4.63                                           | -0.0178                                       |

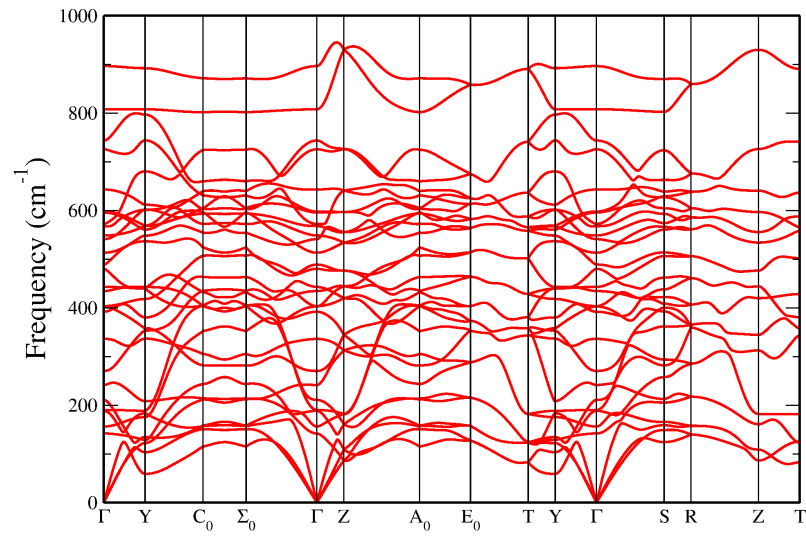

**Figure S7.** Phonon dispersion curves at 65.7 GPa for the proposed *Cmcm* phase.
